# Supplementary material
Source: PubMed Central journal article supplement (PMC10066539)
Supplement: mmc1.pdf [file mmc1.pdf]

**Supplemental information**

**Age or lifestyle-induced accumulation  
of genotoxicity is associated with  
a length-dependent decrease in gene expression**

**Olga Ibañez-Solé, Irantzu Barrio, and Ander Izeta**

## Supplemental figures and legends

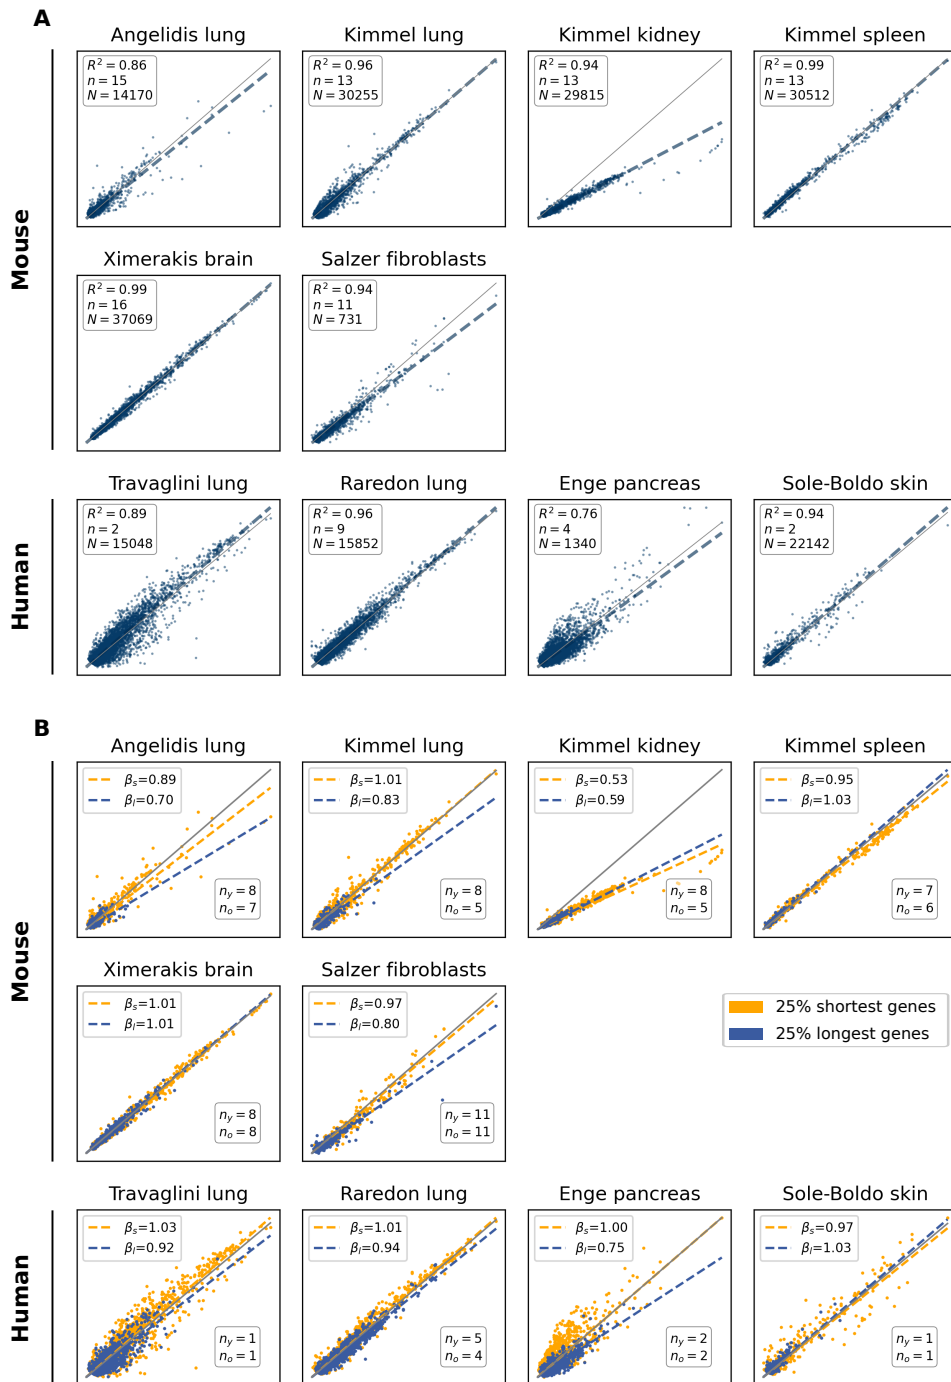

**Figure S1. Downregulation of long genes with aging is replicated in several datasets of different species, related to Figure 1. (A)** Gene expression is conserved with aging in several datasets of different species. Average gene expression in old against young cells in six mouse and four human datasets of several tissues.  $R^2$ : coefficient of determination;  $N$ : total number of cells;  $n$ : number of biological replicates. **(B)** Age-associated shutdown of transcription is found to be gene length-dependent in several datasets of different species.  $\beta_s$  and  $\beta_l$  correspond to the slopes of the multiple linear regression models with interaction fitted on the 1<sup>st</sup> and 4<sup>th</sup> quartiles (top 25% shortest and top 25% longest genes). Number of biological replicates in each age category: young ( $n_y$ ) and old ( $n_o$ ).

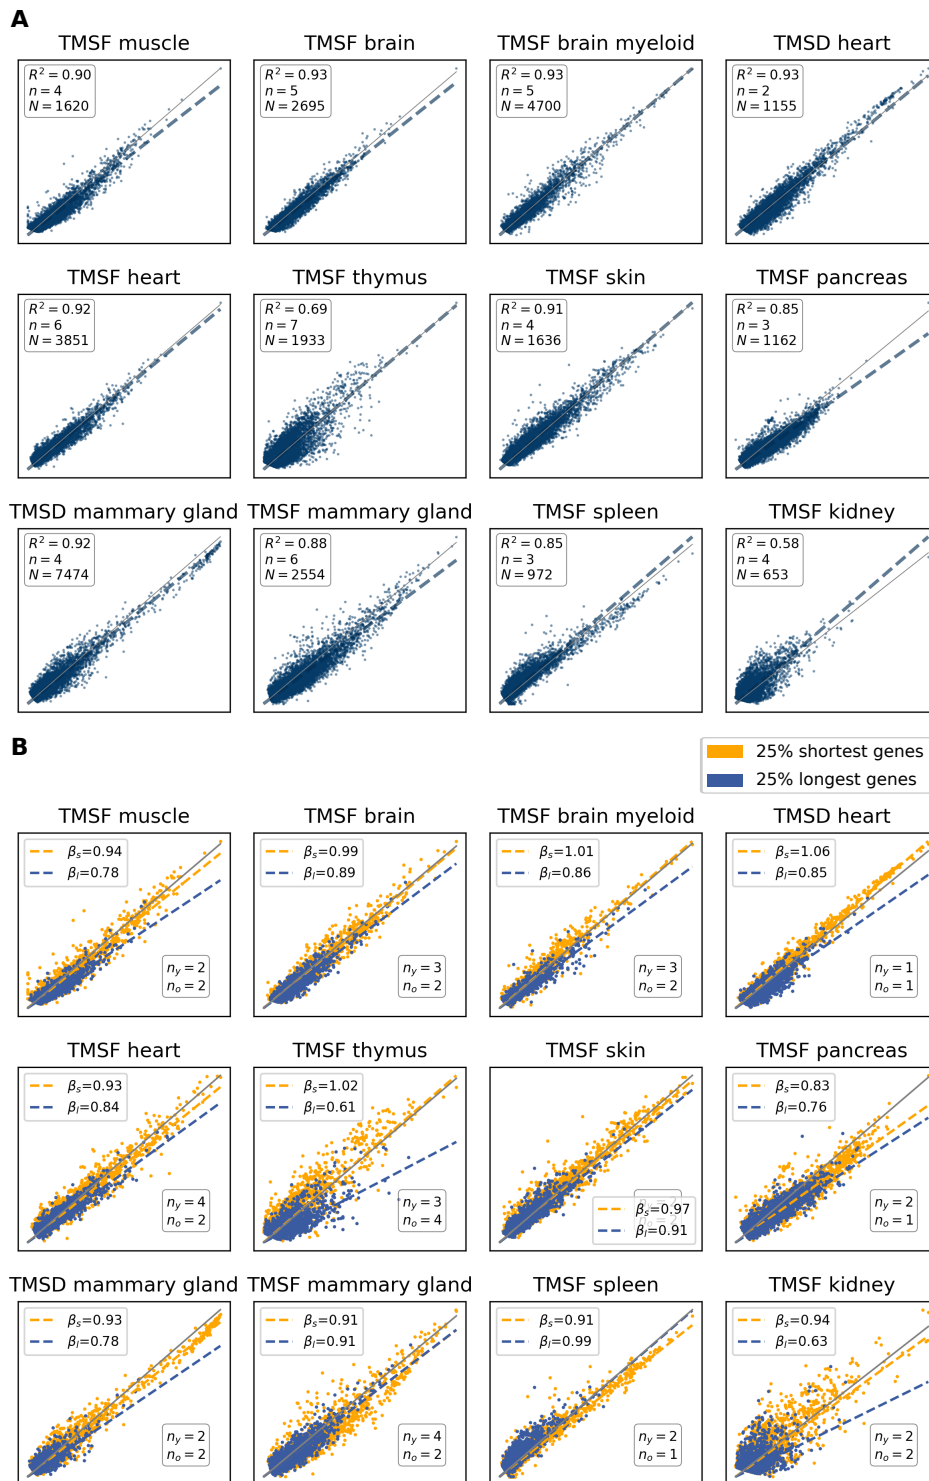

**Figure S2. Age-associated shutdown of transcription is also detected in 18-month-old females, related to Figure 1. (A)** Gene expression is highly conserved but shows a detectable decay with aging in 18-month-old female mice as well. Scatter plots showing the average gene expression in 18-month-old female mice against average gene expression in 3-month-old female mice in 11 tissues (12 comparisons) from the TMS FACS and the TMS droplet datasets<sup>20</sup>. Each dot represents a gene.  $N$ : number of single cells;  $n$ : number of biological replicates.  $R^2$ : coefficient of determination. **(B)** Age-associated shutdown of transcription preferentially affects long genes. The scatter plots show the average gene expression in 18-month-old versus 3-month-old female mice. The top 25% and bottom 25% of the total genes according to their gene length are shown in blue and yellow, respectively.  $\beta_s$  and  $\beta_l$  correspond to the slopes of the multiple linear regression models with interaction fitted on the 1<sup>st</sup> and 4<sup>th</sup> quartiles (top 25% shortest and top 25% shortest genes). Number of young ( $n_y$ ) and old ( $n_o$ ) biological replicates are shown.

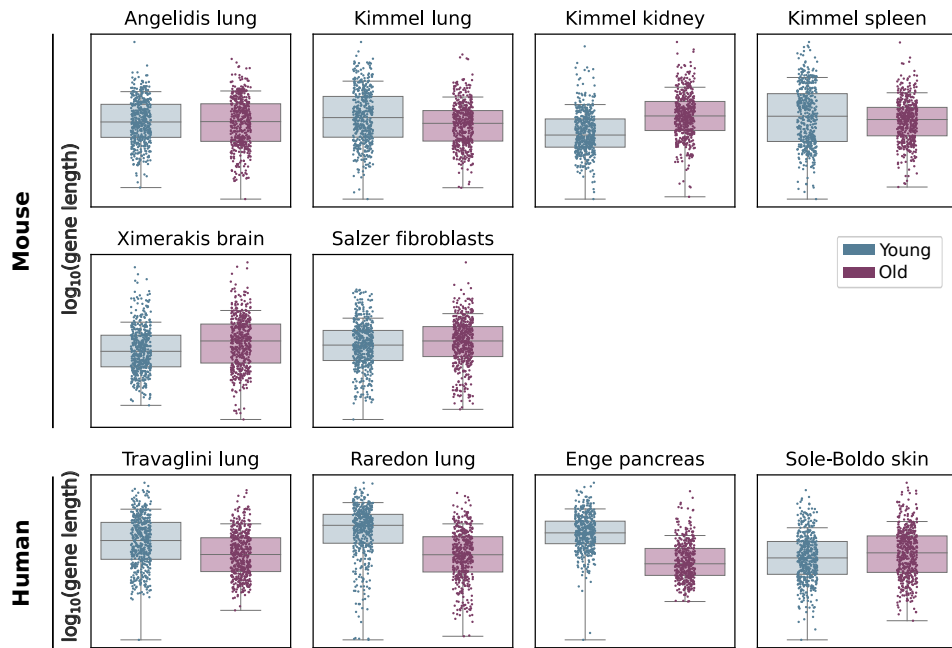

**Figure S3. Downregulation of long genes is found in several datasets of different species, related to Figure 2.** Top 300 DEGs between young and old cells in 10 independent aging datasets from mouse and human. The 300 differentially expressed genes between young and old individuals were obtained using the Wilcoxon method.

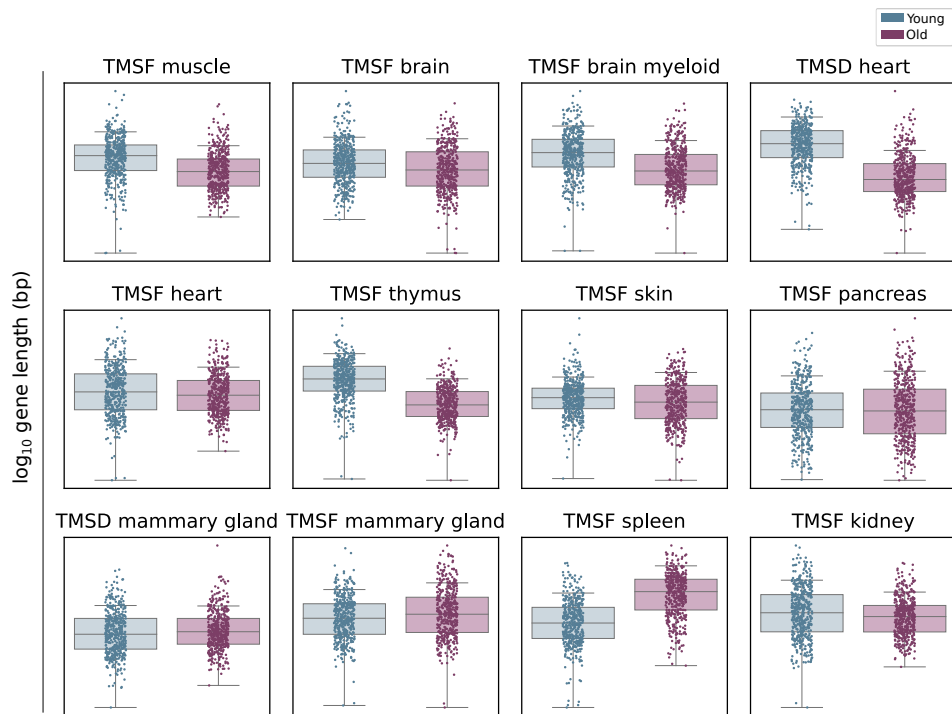

**Figure S4. Downregulation of long genes is also detected in 18-month-old female mice, related to Figure 2.** Top 300 DEGs between young and old cells in 12 aging datasets from the Tabula Muris Senis<sup>20</sup>. The 300 differentially expressed genes between 3-months-old and 18-months-old female mice were obtained using the Wilcoxon method.



## Supplemental tables

|               | 25% shortest (Q1) |              |           | 25% longest (Q4) |             |           |
|---------------|-------------------|--------------|-----------|------------------|-------------|-----------|
|               | short_min         | short_median | short_max | long_min         | long_median | long_max  |
| Bladder       | 65                | 5,373        | 10,218    | 58,647           | 104,278     | 2,270,723 |
| Brain         | 63                | 5,402        | 10,143    | 52,003           | 93,157      | 1,211,426 |
| Brain myeloid | 69                | 5,521        | 10,418    | 57,559           | 103,285     | 2,257,271 |
| Heart         | 69                | 5,196        | 9,713     | 52,057           | 95,055      | 2,270,723 |
| Kidney        | 63                | 5,402        | 9,905     | 49,274           | 88,337      | 1,503,513 |
| Liver         | 108               | 5,494        | 10,367    | 56,554           | 101,606     | 2,960,898 |
| Lung          | 63                | 5,574        | 10,615    | 59,384           | 108,898     | 2,960,898 |
| Muscle        | 64                | 5,897        | 11,150    | 63,517           | 118,298     | 2,960,898 |
| Pancreas      | 67                | 5,526        | 10,471    | 55,760           | 100,580     | 2,960,898 |
| Skin          | 63                | 5,411        | 10,151    | 56,744           | 101,808     | 2,960,898 |
| Spleen        | 63                | 5,379        | 9,987     | 50,379           | 89,933      | 1,503,513 |
| Thymus        | 63                | 5,538        | 10,287    | 54,303           | 99,058      | 2,960,898 |

**Table S1. Length of the Q1 (25% shortest) and Q4 (25% longest) genes used in the analysis of Figure 1.** The minimum (min), median and maximum (max) gene lengths (bp) are shown for the two gene categories (short, long).

|               | Q1           |       | Q1-Q2        |          | Q1-Q3        |          | Q1-Q4        |        |
|---------------|--------------|-------|--------------|----------|--------------|----------|--------------|--------|
|               | Est. (SE)    | p-val | Est. (SE)    | p-val    | Est. (SE)    | p-val    | Est. (SE)    | p-val  |
| Bladder       | 1.02 (<0.01) | 0     | -0.03 (0.01) | <0.001   | -0.05 (0.01) | <0.001   | -0.07 (0.01) | <0.001 |
| Brain         | 0.86 (<0.01) | 0     | -0.25 (0.01) | <0.001   | -0.35 (0.01) | <0.001   | -0.43 (0.01) | <0.001 |
| Brain myeloid | 1.03 (<0.01) | 0     | -0.06 (0.01) | <0.001   | -0.11 (0.01) | <0.001   | -0.29 (0.01) | <0.001 |
| Heart         | 1.02 (<0.01) | 0     | -0.09 (0.01) | <0.001   | -0.17 (0.01) | <0.001   | -0.28 (0.01) | <0.001 |
| Kidney        | 0.93 (<0.01) | 0     | -0.03 (0.01) | 3.85E-02 | -0.08 (0.02) | <0.001   | -0.19 (0.02) | <0.001 |
| Liver         | 0.86 (<0.01) | 0     | -0.06 (0.01) | <0.001   | -0.08 (0.01) | <0.001   | -0.20 (0.02) | <0.001 |
| Lung          | 1.16 (0.01)  | 0     | -0.24 (0.02) | <0.001   | -0.39 (0.02) | <0.001   | -0.50 (0.02) | <0.001 |
| Muscle        | 1.26 (0.01)  | 0     | -0.36 (0.02) | <0.001   | -0.50 (0.02) | <0.001   | -0.62 (0.02) | <0.001 |
| Pancreas      | 0.85 (<0.01) | 0     | -0.03 (0.01) | 2.83E-02 | -0.06 (0.01) | <0.001   | -0.14 (0.01) | <0.001 |
| Skin          | 1.09 (<0.01) | 0     | -0.13 (0.01) | <0.001   | -0.21 (0.01) | <0.001   | -0.29 (0.01) | <0.001 |
| Spleen        | 0.99 (<0.01) | 0     | 0.05 (0.01)  | <0.001   | -0.03 (0.01) | 3.80E-02 | -0.19 (0.01) | <0.001 |
| Thymus        | 1.02 (<0.01) | 0     | -0.13 (0.02) | <0.001   | -0.25 (0.02) | <0.001   | -0.41 (0.02) | <0.001 |

**Table S2. Linear models fit on short and long genes are significantly different in 12 murine aging mouse datasets, related to Figure 1.** We test for the difference between the slope that best fits the old vs young average gene expression using the Q1 genes (25% shortest) and the slope that corresponds to each of the other three quartiles (Q2, Q3, Q4). Q1-Q2, Q1-Q3 and Q1-Q4 represent the differences between the slopes fitted on Q1 and each of the quartiles. Est. (estimate), SE (standard error), p-val (*p*-value).

|               | U statistic | p-value  |
|---------------|-------------|----------|
| Bladder       | 28948.5     | 5.23e-10 |
| Brain         | 27401.0     | 2.52e-10 |
| Brain myeloid | 13075.0     | 1.45e-43 |
| Heart         | 12005.5     | 5.54e-45 |
| Kidney        | 22024.0     | 9.91e-21 |
| Liver         | 31636.0     | 0.000227 |
| Lung          | 10844.0     | 7.16e-52 |
| Muscle        | 8774.5      | 7.31e-59 |
| Pancreas      | 25380.0     | 6.00e-12 |
| Skin          | 12953.5     | 1.35e-44 |
| Spleen        | 19386.0     | 5.45e-25 |
| Thymus        | 10888.5     | 1.97e-50 |

**Table S3. Mann-Whitney test comparing lengths of DEG between young and old cells U statistic and p-value associated with each comparison, related to Figure 2.** The test compares the mean  $\log_{10}$  gene length (bp) of the top 300 DEGs between young and old cells in 12 murine tissues.

|               | Q1          |        | Q1-Q2        |         | Q1-Q3        |        | Q1-Q4        |        |
|---------------|-------------|--------|--------------|---------|--------------|--------|--------------|--------|
|               | Est. (SE)   | p-val  | Est. (SE)    | p-val   | Est. (SE)    | p-val  | Est. (SE)    | p-val  |
| TMSD F (3-18) | 1.06 (0.00) | <0.001 | -0.07 (0.01) | <0.001  | -0.14 (0.01) | <0.001 | -0.21 (0.01) | <0.001 |
| TMSD F (3-21) | 1.06 (0.00) | <0.001 | -0.04 (0.01) | <0.001  | -0.12 (0.01) | <0.001 | -0.22 (0.01) | <0.001 |
| TMSD M (1-18) | 0.97 (0.00) | <0.001 | -0.04 (0.01) | <0.001  | -0.05 (0.01) | <0.001 | -0.09 (0.01) | <0.001 |
| TMSD M (1-24) | 0.98 (0.00) | <0.001 | -0.03 (0.01) | <0.001  | -0.04 (0.01) | <0.001 | -0.07 (0.01) | <0.001 |
| TMSF F (3-18) | 0.93 (0.00) | <0.001 | -0.01 (0.01) | 7.84E-2 | -0.05 (0.01) | <0.001 | -0.09 (0.01) | <0.001 |
| TMSF M (3-24) | 1.02 (0.01) | <0.001 | -0.09 (0.01) | <0.001  | -0.17 (0.01) | <0.001 | -0.28 (0.01) | <0.001 |

**Table S4. Output of the statistical analysis comparing the effects of the different gene length groups based on a linear model with interaction, related to Figure 3.** We test for the difference between the slope that best fits the old vs young average gene expression using the Q1 genes (25% shortest) and the slope that corresponds to each of the other three quartiles (Q2, Q3, Q4). Q1-Q2, Q1-Q3 and Q1-Q4 represent the differences between the slopes fitted on Q1 and each of the quartiles. Datasets: murine heart and aorta TMSD (Tabula muris senis droplet), TMSF (Tabula muris senis FACS), age of the cohorts are shown in parentheses (months).

| Data  | Comparison    | Q1           |       | Q1-Q2         |          | Q1-Q3         |          | Q1-Q4        |        |
|-------|---------------|--------------|-------|---------------|----------|---------------|----------|--------------|--------|
|       |               | Est. (SE)    | p-val | Est. (SE)     | p-val    | Est. (SE)     | p-val    | Est. (SE)    | p-val  |
| Lin   | H vs UV       | 0.91 (<0.01) | 0     | -0.07 (<0.01) | <0.001   | -0.10 (0.01)  | <0.001   | -0.11 (0.01) | <0.001 |
|       | VD vs UV      | 0.91 (<0.01) | 0     | -0.08 (<0.01) | <0.001   | -0.10 (0.01)  | <0.001   | -0.13 (0.01) | <0.001 |
|       | H vs VD       | 0.98 (<0.01) | 0     | 0.01 (<0.01)  | 0.392    | -0.01 (0.01)  | 0.201    | 0.00 (0.01)  | 0.903  |
| Gold. | H vs Smoker   | 1.01 (<0.01) | 0     | -0.03 (<0.01) | <0.001   | -0.06 (0.01)  | <0.001   | -0.12 (0.01) | <0.001 |
| Muld. | WT vs ADH5KO  | 1.00 (<0.01) | 0     | 0.02 (<0.01)  | <0.001   | 0.01 (0.01)   | 0.171    | 0.01 (0.01)  | 0.0969 |
|       | WT vs CSBKO   | 1.00 (<0.01) | 0     | 0.03 (<0.01)  | <0.001   | 0.03 (<0.01)  | <0.001   | 0.04 (0.01)  | <0.001 |
|       | WT vs DKO     | 0.99 (<0.01) | 0     | -0.02 (<0.01) | 4.68E-03 | -0.05 (0.01)  | <0.001   | -0.06 (0.01) | <0.001 |
| Wang  | GC: ct vs UV  | 0.94 (<0.01) | 0     | 0.00 (<0.01)  | 0.691    | 0.01 (0.01)   | 9.30E-03 | 0.00 (0.01)  | 0.893  |
|       | mut: ct vs UV | 0.94 (<0.01) | 0     | -0.04 (<0.01) | <0.001   | -0.07 (0.01)  | <0.001   | -0.10 (0.01) | <0.001 |
|       | ct: GC vs mut | 0.97 (<0.01) | 0     | 0.02 (<0.01)  | <0.001   | 0.02 (<0.01)  | <0.001   | 0.00 (<0.01) | 0.958  |
|       | UV: GC vs mut | 0.99 (<0.01) | 0     | -0.03 (<0.01) | <0.001   | -0.08 (<0.01) | <0.001   | -0.12 (0.01) | <0.001 |

**Table S5. Statistical significance of the analyses done on premature aging datasets, related to Figures 4-7.** We test for the difference between the slope that best fits  $y$  (condition 2) vs  $x$  (condition 1) average gene expression using the Q1 genes (25% shortest) and the slope that corresponds to each of the other three quartiles (Q2, Q3, Q4). Q1-Q2, Q1-Q3 and Q1-Q4 represent the differences between the slopes fitted on Q1 and each of the quartiles. Datasets: Lin<sup>33</sup>, Gold. (Goldfarbmuren)<sup>35</sup>, Muld. (Mulderring)<sup>38</sup> and Wang<sup>31</sup>. Comparisons between conditions: H (healthy), UV (UV-radiated), VD (UV-radiated upon vitamin D treatment), ADH5KO (*Adh5*<sup>-/-</sup>), CSBKO (*Csb*<sup>m/m</sup>), DKO (*Adh5*<sup>-/-</sup> *Csb*<sup>m/m</sup> double knock out), GC (gene-corrected), ct (control), mut (mutant). Est. (estimate), SE (standard error), p-val ( $p$ -value).
